# Environmental factors and mobility predict COVID-19 seasonality

Martijn J. Hoogeveen<sup>1</sup>, Aloys C.M. Kroes<sup>2</sup>, and Ellen K. Hoogeveen<sup>3</sup>

1. Department Technical Sciences & Environment, Open University, the Netherlands.
2. Department of Medical Microbiology, Leiden University Medical Center (LUMC), Leiden, the Netherlands.
3. Department of Internal Medicine, Jeroen Bosch Hospital, Den Bosch, the Netherlands.

Corresponding author:

Martijn J. Hoogeveen

[martijn.hoogeveen@icecat.com](mailto:martijn.hoogeveen@icecat.com)

## Abstract

**Background:** We recently showed that seasonal patterns of COVID-19 incidence and Influenza-Like Illnesses incidence are highly similar, in a country in the temperate climate zone, such as the Netherlands (latitude: 52°N). We hypothesize that in The Netherlands the same environmental factors and mobility trends that are associated with the seasonality of flu-like illnesses are predictors of COVID-19 seasonality as well.

**Methods:** We used meteorological, pollen/hay fever and mobility data from the Netherlands with its 17.4 million inhabitants. For the reproduction number of COVID-19 ( $R_t$ ), we used data from the Dutch State Institute for Public Health. This  $R_t$  metric is a daily estimate that is based on positive COVID-19

NOTE: This preprint reports new research that has not been certified by peer review and should not be used to guide clinical practice.

tests in the Netherlands in hospitals and municipalities. For all datasets we selected the overlapping period of COVID-19 and the first allergy season: from February 17, 2020 till September 21, 2020 (total number of measurements:  $n = 218$ ), the end of pollen season. Backward stepwise multiple linear regression was used to develop an environmental prediction model of the  $R_t$  of COVID-19. Next, we studied whether adding mobility trends to an environmental model improved the predictive power.

**Results:** By means of stepwise backward multiple linear regression four highly significant ( $p$  value  $< 0.01$ ) predictive factors are selected in our combined model: temperature, solar radiation, hay fever incidence, and mobility to indoor recreation locations. Our combined model explains 87.5% of the variance of  $R_t$  of COVID-19 and has a good and highly significant fit:  $F(4, 213) = 374.2$ ,  $p$ -value  $< 0.00001$ . The combined model had a better overall predictive performance compared to a solely environmental model, which still explains 77.3% of the variance of  $R_t$ , and a good and highly significant fit:  $F_{(4, 213)} = 181.3$ ,  $p < 0.00001$ .

**Conclusions:** We conclude that the combined mobility and environmental model can adequately predict the seasonality of COVID-19 in a country with a temperate climate like the Netherlands. In this model higher solar radiation, higher temperature and hay fever are related to lower COVID-19 reproduction, and mobility to indoor recreation locations with increased COVID-19 spread.

## Keywords

COVID-19 reproduction number, seasonality, solar radiation, allergens, allergies, mobility, temperature

## Highlights

- The seasonality of COVID-19 can be well-explained by environmental factors and mobility.
- A combined model explains 87.5% of the variance of the reproduction number of COVID-19
- Inhibitors of the reproduction number of COVID-19 are higher solar radiation, and seasonal allergens/allergies.

- Mobility, especially to indoor recreation locations, increases the reproduction number of COVID-19.
- Temperature has no direct effect on the reproduction number of COVID-19, but affects mobility and seasonal allergens.
- Adding mobility trends to an environmental model improves the predictive value regarding the reproduction number of COVID-19.

## 1. Introduction

COVID-19 appears to be subject to multi-wave seasonality [1, 2], comparable to other respiratory viral infections and pandemics since time immemorial [3, 4]. It is observed that the COVID-19 community outbreaks have a pattern that is similar to those of other seasonal respiratory viruses [5, 6, 7, 8], whereby the seasonal dips coincide with allergy season in regions in the temperate climate zone [9, 10, 11]. The same factors that drive the seasonality of flu-like illnesses, appear to drive COVID-19 seasonality: solar radiation including ultraviolet (UV) light, temperature, relative or specific humidity, seasonal allergens (pollens) and allergies, and behavior. Regarding behavior, mobility data show the beneficial effect of restrictive measures on the effective reproduction number ( $R_t$ ) of COVID-19 [12, 13, 14], but the seasonal aspects of mobility are often overlooked. For example, during nice weather people spend more time outdoors. For flu-like illnesses, we previously showed that a compound predictor of solar radiation and seasonal allergens is highly significant though moderately strong  $r(222) = -0.48$  ( $p < 0.001$ ) [9]. It is unclear why environmental factors, such as higher solar radiation, a higher level of seasonal allergens (pollens) and subsequently hay fever are consistently associated with a lower  $R_t$  of COVID-19, and, thus possibly associated to COVID-19 seasonality as well. Exposure to solar radiation might be associated with better COVID-19 outcomes [15], and daylight is understood to regulate melatonin levels, and subsequently circadian (lung) immunity [16]. Further, increased UV light levels are associated with a more rapid degradation of SARS-CoV-2 particles [17], although the clinical relevance of this effect is debatable.

Upon the observation that allergic diseases are associated with lower rates of COVID-19 hospitalizations [18, 19], several pathophysiological explanations are provided, such as a lower expression of membrane-bound angiotensin-converting enzyme 2 (ACE-2) [20, 21], higher eosinophil counts [22, 23, 24], a reduced risk of a cytokine storm and hyper-inflammation [25], and T cell-mediated immune responses to allergens which might be effective against COVID-19 as well [26]. On the other hand, a recent international epidemiological study reported a positive correlation between pollen concentrations and COVID-19 incidence [27]. As another study, from Spain, could not confirm the latter finding [28], this is still a matter of considerable debate.

Further, we noticed that an estimate of  $R_t$  discriminates better between independent variables than incidence metrics [9], as it appears to be a more volatile or sensitive metric, includes incubation time lags, and is corrected for test bias and independent of seasonality. The reproduction number has also become the standard in predictive modelling for COVID-19..

Our hypothesis is that a model, combining both environmental factors and mobility trends, improves the prediction of the seasonality of COVID-19 compared to each factor alone. Therefore, the main objective of this study is to explore a model, including both environmental factors and mobility trends of people, to improve the prediction of the reproduction number for COVID-19 during spring season which coincides with the low-season of flu-like respiratory diseases in a country in the temperate climate zone such as the Netherlands (latitude: 52°N).

## 2. Methods

### 2.1 Data

#### 2.1.1 Reproduction Number for COVID-19

For the observations of  $R_t$ , we used the respective dataset from the Dutch State Institute for Public Health (Rijksinstituut voor Volksgezondheid en Milieu; RIVM) [29] from February 17, 2020 till September 21, 2020. RIVM uses a standard method to calculate the  $R_t$  metric on the basis of the input

data described below [31]. RIVM's  $R_t$  metric is a daily estimate that is based on positive COVID-19 tests in the Netherlands in hospitals from national intensive care foundation (NICE) and from RIVM's own institutes in municipalities (GGD). When the first symptomatic day of a COVID-19 infected person is not known, RIVM estimates this date. Further, RIVM assumes an average 4 days delay period between infection and first symptoms, and estimate the mean incubation period to be 6.4 days (95% confidence interval (CI): 5.6-7.7) [30].

### 2.1.2 Meteorological data

Regarding meteorological data, we used datasets from the Royal Dutch Meteorological Institute [32] from February 17, 2020 till September 21, 2020. The downloaded daily data included global solar radiation in  $J/cm^2$ , mean relative atmospheric humidity (% RH), and average temperature in degrees Celsius. For comparison, and given their effects on pollen distribution, we also added precipitation duration in 0.1 hour, precipitation amount in 0.1 mm, mean wind speed, minimum and maximum temperatures in degrees Celsius, mean dew point temperature in degrees Celsius, and sunshine duration in 0.1 hour. Additionally, we calculated the wind chill temperature per day. These datasets were obtained from the KNMI's centrally located De Bilt weather station. De Bilt is traditionally chosen as it provides an approximation of modal meteorological parameters in the Netherlands, which is a small country. Furthermore, all major population centers in the Netherlands, which account for around 70% of the total Dutch population, are within a radius of only 60 kilometers from De Bilt. We therefore assumed in this study that the measurements from De Bilt are sufficiently representative for the meteorological conditions typically experienced by the Dutch population.

### 2.1.3 Mobility data

We used Google mobility data for relative trends regarding visits to different types of locations in the Netherlands [33] for the same period from February 17, 2020 till September 21, 2020. These location types are: Residential, Workplaces, Indoor Recreation (called retail & recreation by Google, which includes restaurants, cafes, retail, shopping centers, theme parks, museums, libraries, and movie theaters), Outdoor Recreation (called Parks by Google, and including places such as national parks,

public beaches, marinas, dog parks, plazas, and public gardens), and Transit Stations (places such as public transport hubs such as subway, bus, and train stations). For comparison, as these are less affected by lockdowns, we also included mobility trends for grocery & pharmacy (places such as grocery markets, food warehouses, farmers markets, specialty food shops, drug stores, and pharmacies).

#### *2.1.4 Seasonal allergens and allergies*

For hay fever (allergic rhinitis) we used the data from Nivel [34], for the same period, about weekly incidence reports at primary medical care level, per 100,000 citizens in the Netherlands. Primary medical care is the day-to-day, first-line healthcare given by local healthcare practitioners to their registered clients as typical for the Netherlands. The hay fever incidence metric is a weekly average based on a representative group of 40 primary care units, and calculated using the number of hay fever reports per primary care unit divided by the number of patients registered at that unit. This is then averaged for all primary care units and then extrapolated to the complete population. We used interpolation to generate a daily data set.

For comparison, we included daily mean pollen concentrations based on the data from two Dutch pollen stations: Elkerliek Ziekenhuis in Helmond (latitude 51.487059, longitude 5.662036) [35], and Leiden University Medical Center in Leiden (latitude 52.166309, longitude 4.477315) [36]. The mean pollen concentration is measured in grains/m<sup>3</sup>, whereby we used the daily totals for the 42 types of pollen particles for which by both stations the numbers are counted and averaged per day per 1 m<sup>3</sup> of air. The common Burkard spore trap is used by these stations. It was noticed before that a metric including all available allergenic particle types, lower allergenic or higher allergenic, correlates stronger with the incidence or R<sub>t</sub> of COVID-19, than a metric only based on higher allergenic particle types [9, 11].

## **2.2 Data sets consolidation**

For all datasets we have selected the same overlapping period of COVID-19 and the first full allergy season [ 8], during 2020. The overlapping period runs therefore from February 17, 2020 till September 21, 2020 ( $n = 218$  days), when the total pollen concentrations structurally drop below  $10 \text{ grains/m}^3$  as an indication for the end of pollen season.

For sensitivity analyses, we also extended the datasets to periods till June 10, 2021 ( $n = 480$  days).

For mobility datasets the clearly intra-week patterns required a 7 days moving average to reduce noise. Therefore, for reasons of consistency, we calculated 7 days moving averages for all other variables as well.

### 2.3 Statistical analysis

Variables are presented with their sample sizes ( $n$ ), means ( $M$ ), and standard deviations ( $SD$ ). We calculated correlation coefficients to assess the strength and direction of relations of each independent variable with  $R_t$ , and with each other.

Stepwise backward multiple linear regression for all independent variables on  $R_t$  was used to keep only candidate predictors that are significant ( $p < 0.05$ ) in the model and remove insignificant predictors. Next, we removed predictors that were multicollinear as defined below. With the remaining independent variables the F-value, standard deviations and errors, degrees of freedom ( $DF$ ), and significance level, are calculated to test the goodness of fit hypothesis for our predictive model for  $R_t$ . Further, the multiple R, Multiple R squared ( $R^2$ ) and adjusted  $R^2$  correlation coefficients are calculated to estimate the predictive power of our model. Additionally, the algebraic equation to predict  $R_t$  is determined, which is just to be understood as an empirical formula. Per independent variable the (standard) coefficient, standard error, t-stat and its 95% CI, probability, and the variance inflation factor value (VIF) are calculated.

Further, as linear regression assumes normality of the residuals, we applied the Shapiro-Wilk test and to test the homoscedasticity requirement – homogeneity of variance of residuals– the White test is

applied. To analyze multicollinearity we used a VIF value of 2.5 as a threshold. Additionally, the priori power is calculated of each predictor alone and compared with the full model. Although the independent variable  $R_t$  assumes time lags, we also studied the autocorrelations of residuals, whereby we interpret an autocorrelation beyond a time lag of 7 days as an indication that our model probably might miss a key predictor. Finally, we created calibration plots to visually review the fit of the model.

For selected independent variables with a p value  $< 0.05$  and VIF score  $< 2.5$ , standard  $\log_{10}$ , square root and quadratic ( $^2$ ) data transformations are applied to reduce non-linearity in relations between variables which helps to reduce skewness, and, especially, meet the normality and homoscedasticity requirement. Such data transformations do not change the nature and direction of relations between independent variables and  $R_t$ . In case of the relative mobility trend data we added a constant before such data transformations to avoid loss of data because of negative numbers. For other variables that was not necessary as they only included positive numbers.

We reported the results in APA style, adapted to journal requirements, and applied the TRIPOD guidelines in so far applicable

All statistical analyses were done with Stats Kingdom 2021, which we benchmarked on R version 3.5.

### 3. Results

#### 3.1 Variables and their correlations

The sample sizes (N), means, and SDs of the independent variables as used in our multiple linear regression models are summarized in Table 1. The values are given for the data sets after applied data transformations.

During the allergy season, the factors that negatively correlate with  $R_t$ , are in order of strength: hay fever ( $r(218) = -0.65$ ,  $p < 0.00001$ ), solar radiation ( $r(218) = -0.63$ ,  $p < 0.00001$ ), pollen ( $r(218) = -0.62$ ,  $p < 0.00001$ ), and temperature ( $r(218) = -0.12$ ,  $p = 0.085$ ). Positively correlated to  $R_t$  are relative



humidity ( $r(218) = 0.55$ ,  $p < 0.00001$ ) and the related dew point temperature ( $r(218) = 0.12$ ,  $p = 0.082$ ). Further, higher relative humidity is associated with rain or fog, and thus reduced solar radiation and lower temperature. Temperature and solar radiation are associated as well, although only moderately strong:  $r(218) = 0.39$ ,  $p < .00001$ ).

Pollen and hay fever are, as to be expected, associated:  $r(218) = 0.50$ ,  $p < .00001$ ), although moderately strong. We did not add allergenicity weights to different pollen particles, and the pollen stations do not cover all types of allergenic particles such as, for example, mold spores. Therefore, having both data sets next to each other has added value, at least for our environmental model.

Solar radiation is an important factor as it has, during allergy season, stimulating effects on pollen ( $r(218) = 0.40$ ,  $p < .00001$ ) and subsequently hay fever ( $r(218) = 0.40$ ,  $p < .00001$ ), in addition to its associations with temperature and  $R_t$ .

The mobility places that are correlated with  $R_t$  are Indoor Recreation ( $n(218) = 0.761$ ,  $p < .00001$ ), Residential ( $n(218) = -0.684$ ,  $p < .00001$ ), Transit Stations ( $r(218) = 0.563$ ,  $p < .00001$ ), Workplaces ( $r(218) = 0.532$ ,  $p < .00001$ ), Grocery & Pharmacy ( $r(218) = 0.472$ ,  $p < .00001$ ), and, not significantly, Outdoor Recreation ( $r(218) = -0.048$ ,  $p = 0.5$ ). Indoor Recreation and Residential are most strongly inverse correlated:  $r(218) = -0.817$ ,  $p < .00001$ ), and thus highly collinear ( $p > 0.8$ ). Indoor Recreation has moderately strong positive correlations with all other mobility variables, and should therefore seen as a representant of a cluster.

Temperature and dew point temperature had a high correlation of  $r(218) = 0.84$  ( $p < 0.00001$ ), and appear thus to be collinear. These variables although they have, standalone, no significant correlation with  $R_t$ , still play a role in our combined and environmental model, probably because of their indirect effects on mobility and pollen maturation and dispersion, with their opposite associations with  $R_t$ .

### 3.2 Outcomes combined model

After several iterations with stepwise backward multiple linear regression, four independent variables were selected from the combined pool of environmental and mobility variables that are both significant ( $p < 0.05$ ) and have a VIF value below 2.5. These selected predictors are: temperature, solar radiation, hay fever, and Indoor Recreation (see Table 2). From the mobility datasets, residential was significant as well but was deselected based on its very high multicollinearity with all other mobility variables, homoscedasticity concerns and lowered explanatory power. In other words, staying at home has a beneficial effect, but, does not explain at which out-of-home location most COVID-19 infections occur. Without the hay fever data, the pollen data would have been significant, but using only the pollen data led to homoscedasticity concerns, which were fully mitigated when using the hay fever data instead.

On the basis of the multiple linear regression test, we can reject the null-hypothesis ( $H_0$ ) that our combined predictive model with the four selected factors does not provide a good fit:  $F_{(4, 213)} = 374.2$ ,  $p < 0.00001$ .  $R^2$  equals 0.875, which means that our predictors explain 87.5% of the variance of  $R_t$ . The adjusted R square equals 0.873, and the coefficient of multiple correlation ( $R$ ) equals 0.936. A simple Pearson correlation between our model's predicted and the observed values for  $R_t$  is equally strong and highly significant:  $r(218) = 0.996$ ,  $p < .00001$ . It means that there is a strong, and highly significant, relationship between our combined model's predicted and the observed  $R_t$  of COVID-19 (see Fig. 1 and Fig. 2).

The combined predictive model's regression formula looks as follows:

$$\hat{R}_t = (0.804 + 0.00385 \sqrt{M_R} - 0.132 \log_{10} HF - 0.0637 \log_{10} SI - 0.000561 T^2)^2$$

Where  $\hat{R}_t$  is the predicted effective reproduction number for COVID-19,  $M_R$  is the indexed mobility trend data for Indoor Recreation locations to which the mobility constant of 60,000 is added,  $HF$  is the hay fever incidence per 100K citizens,  $SI$  is the mean global solar radiation in  $J/cm^2$ , and  $T$  is the mean temperature in degrees Celsius.. In our dataset, the transformed variables only contain positive numbers.

### 3.3 Statistical outcomes environmental model

For the environmental model we excluded mobility data. Again the solar radiation and hay fever were selected as predictor of  $R_t$ . The pollen metric added explanatory power, and dew point temperature was selected at the expense of its collinear, temperature (see Table 3). Relative humidity was again deselected as an insignificant predictor.

On the basis of the multiple linear regression test, we can reject the  $H_0$  that our environmental predictive model with the four selected factors does not provide a good fit:  $F_{(4, 213)} = 181.3$ ,  $p < 0.00001$ , and  $R^2$  equals 0.773, which means that our environmental predictors explain 77.3% of the variance of  $R_t$ . The adjusted  $R^2$  equals 0.769, and the coefficient of multiple correlation ( $R$ ) equals 0.879. It means that there is a very strong direct and highly significant relation between our environmental model's predicted and the observed reproduction numbers of COVID-19.

The environmental model's regression formula looks as follows:

$$\hat{R}_t = (3.00 - 0.0587 \log_{10} SA - 0.592 \log_{10} SI + 0.00674 T_d - 0.000262 HF)^2$$

Where  $R_t$  is the predicted reproduction number for COVID-19, SA is average seasonal allergens or pollen concentrations in particles/m<sup>3</sup>, SI is the 7 days moving average of global solar (ir)radiation in J/cm<sup>2</sup>,  $T_d$  is the average dew temperature in degrees Celsius, and HF is the hay fever incidence per 100K citizens. In our dataset, the transformed variables only contain positive numbers.

#### 4. Discussion

The predictive power of the combined environmental-mobility model including solar radiation, hay fever, temperature and visits to Indoor Recreation locations (87.5%) surpasses the environmental model (77.3%) with more than 10%. Furthermore, the improved accuracy of the combined model shows that adding mobility trends not only helps to control the environmental model for lockdown effects, but also clearly improves it by helping to show the importance of seasonal behavior better. For

example, nice weather (sun shine, warm, low humidity) in The Netherlands is related to higher pollen concentrations, and more visits to crowded non-residential locations where social distancing is hard to apply. The latter is in turn associated with increased COVID-19 infections. Interestingly, increased visits to Outdoor Recreation locations are not associated with an increase in COVID-19 infections ( $R_t$ ). This finding suggests that outdoor transmission of SARS-CoV-2 is far less likely than indoor transmission, and that restrictive policies that limit visiting Outdoor Recreation locations have less added value.

Although, overall, the environmental model is weaker than the combined model, it is still somewhat better at the onset of COVID-19 during February and March 2020. This is probably explained by the exclusion of ski holiday locations abroad, in Italy and Austria, where many of the first patients contracted COVID-19, which leads to an underestimation of both the Indoor Recreation and Outdoor Recreation trend. On the other hand, the combined model is somewhat better in July when lockdown restrictions were relaxed and people were less strict, which is caught well by the mobility trends variable. Both models are almost equally strong in predicting the seasonal decline in March/April, which indicates that the relative importance of restrictive measures was probably not the main driver of that particular decline, but the seasonality effect was.

Of the non-residential locations, especially Indoor Recreation is by far the best predictor of increasing COVID-19 infections ( $R_t$ ), which makes sense as social distancing in busy shopping locations, bars, discos and other such locations, is hard to maintain. Especially, when the seasonality effects are offset by relaxed lockdown measures and social distancing discipline. Even more, if people are under the influence of alcohol and party drugs in crowded party locations, social distancing becomes a distant reality. Additionally, the strong inverse correlation of Residential with  $R_t$ , shows that staying at home, because of lockdown measures, is effective. That all other indoor locations have a positive correlation with  $R_t$ , shows basically the same: when lockdown measures are relaxed, infection rates increase as people will meet more other people.

301

302 The single effect of high temperature on  $R_t$  appears to be not significant. The role of temperature can  
 303 be understood only when its associations with other variables such as mobility trends and pollen  
 304 maturation and dispersion are taken into account. Humidity in general, relative or specific ( $T_d$ ),  
 305 appears to be positively associated to COVID-19 reproduction, as it is associated with a reduced solar  
 306 radiation and seasonal allergens, and more traffic to indoor locations which are associated with an  
 307 increase in infections. Even despite observations that, indoors, very dry air, with a low absolute  
 308 humidity, might favor SARS-CoV-2 transmission, which is likely caused by increased aerosolisation  
 309 of infectious aqueous particles. Finally, although we assume that day length is associated to solar  
 310 radiation, it might still be interesting to look if this solar-related variable could add something to the  
 311 predictive power of our models.

312

### 313 *Methodological concerns*

314 Test bias, especially for new viruses such as COVID-19, is a major methodological challenge. The  
 315 approach to use more reliable metrics such as the number of hospitalizations to generate the  $R_t$  metric  
 316 appears to be a good method to reduce test bias. But, the change of methodology in June 2020, when  
 317 more test stations were included with their fluctuating test capacities, most likely led to the  
 318 introduction of test bias in the  $R_t$  metric. Such reliability concerns may have reduced the predictive  
 319 power of our combined and environmental model.

320 The usefulness of the pollen concentration metric might be improved by taking into account the  
 321 allergenicity per particle type. The allergenicity classification is available, but it is not on a ratio scale  
 322 and there are discussions about the accuracy of this classification. Furthermore, other allergenic  
 323 particles like mold spores, are hardly ever covered by European pollen stations because of budget  
 324 constraints.

We observed that the Indoor Recreation and Outdoor Recreation metric might need to be expanded to holiday locations in foreign countries. Unfortunately, that is something that is currently not possible via the Google Mobility datasets.

In our research we precluded the period of intensive vaccination from January 2021 onward. On the other hand, if the protective immunity would be short-lasting, we might still be confronted with resurgences of COVID-19 [37], and it would be of interest to test the predictive models for such events. It is likely that new waves, will be less intense and short-lived given longer lasting B-cell and T-cell memory of people that have been infected or are vaccinated already. Therefore, it might be good to control for herd immunity levels when testing the predictive models for subsequent allergy seasons.

Additionally, it might be of interest to differentiate  $R_t$  per virus variant, given that genetic drift typically leads to more contagious but less deadly variants, that somewhat change the dynamics of COVID-19.

Finally, testing the predictive models for a wider geographical scope would be of interest, but would require metrics that are not widely available such as a standardized metrics for  $R_t$ , hay fever incidence, and pollen datasets.

## Conclusion

The combined, mobility and environmental, model explains 87.5% of the variance of  $R_t$  of COVID-19 during spring season in a country in the temperate climate zone like the Netherlands, and provides a very good fit ( $F_{(4, 213)} = 374.2$ ,  $p < 0.00001$ ), as the predicted and observed  $R_t$  correlate strongly and highly significantly. The significant predictors in the combined model are temperature, solar radiation, hay fever incidence, and the Indoor Recreation trend. The environmental factors are inversely associated with  $R_t$ . On the other hand, more visits to Indoor Recreation locations is associated with more infections ( $R_t$ ). This seems to be the best mobility predictor for the effects of lockdown measures on the spread ( $R_t$ ) of COVID-19. On the other side of the spectrum, moving to Outdoor Recreation

locations is not significantly associated with changes in  $R_t$ , and including such locations in lockdown regimes appears to be ineffective.

The solely environmental model, is around 10% less powerful than the combined model. Nevertheless, the environmental model shows that pollen concentrations and dew point temperature as a collinear of temperature, have an added explanatory value. Further, there are short periods in which the environmental model beats the combined model.

## References

1. Kissler SM, Tedijanto C, Goldstein E, Grad YH, Lipsitch M. Projecting the transmission dynamics of SARS-CoV-2 through the post-pandemic period. *Science*. **2020**;368(6493): 860-868, <https://doi.org/10.1126/science.abb5793>.
2. Grech V, Cuschieri S, Gauci C. COVID-19: The possible seasonal shape of things to come. *Early Hum Dev*. **2020** Nov 12: 105262, <https://doi.org/10.1016/j.earlhumdev.2020.105262>.
3. Moriyama M, Hugentobler WJ, Iwasaki A. Seasonality of Respiratory Viral Infections. *Annual Review of Virology*. **2020**;7:1, <https://doi.org/10.1146/annurev-virology-012420-022445>.
4. Fox SJ, Miller JC, Meyers LA. Seasonality in risk of pandemic influenza emergence. *PLoS Comput Biol* **2017**; 13(10): e1005749, <https://doi.org/10.1371/journal.pcbi.1005749>.
5. Sajadi MM, Habibzadeh P, Vintzileos A, Shokouhi S, Miralles-Wilhelm F, Amoroso A. Temperature, Humidity and Latitude Analysis to Predict Potential Spread and Seasonality for COVID-19. **2020** March 5, <https://doi.org/10.2139/ssrn.3550308>.
6. Poole L. Seasonal Influences On The Spread Of SARS-CoV-2 (COVID19), Causality, and Forecastabililty (3-15-2020) (March 15, 2020), <https://doi.org/10.2139/ssrn.3554746>.
7. Burra P, Soto-Díaz K, Chalen I, Gonzalez-Ricon RJ, Istanto D, Caetano-Anollés G. Temperature and Latitude Correlate with SARS-CoV-2 Epidemiological Variables but not

with Genomic Change Worldwide. Evolutionary Bioinformatics. 2021 January,  
<https://doi.org/10.1177/1176934321989695>.

8. Hoogeveen MJ, Hoogeveen EK. Comparable seasonal pattern for COVID-19 and flu-like illnesses. One Health. 2021 Dec;13:100277. doi: 10.1016/j.onehlt.2021.100277. Epub 2021 Jun 8.

9. Hoogeveen MJ, Van Gorp ECM, Hoogeveen EK. Can pollen explain the seasonality of flu-like illnesses in the Netherlands? Sci Total Environ. 2021 Feb 10;755(Pt 2):143182, <https://doi.org/10.1016/j.scitotenv.2020.143182>.

10. Hoogeveen MJ. Pollen likely seasonal factor in inhibiting flu-like epidemics. A Dutch study into the inverse relation between pollen counts, hay fever and flu-like incidence 2016–2019, Sci Total Environ. 2020 July 20; 727:138543, <https://doi.org/10.1016/j.scitotenv.2020.138543>.

11. Shah RB, Shah RD, Retzinger DG, Retzinger AC, Retzinger DA, Retzinger GS. Confirmation of an Inverse Relationship between Bioaerosol Count and Influenza-like Illnesses, Including COVID-19. On the Contribution of Mold Spores. MedRxiv 21251322 [preprint]. Feb 16, 2021 [cited March 1, 2021]. Available on: <https://doi.org/10.1101/2021.02.07.21251322>.

12. Kajitani Y, Hatayama M. Explaining the effective reproduction number of COVID-19 through mobility and enterprise statistics: Evidence from the first wave in Japan. PLoS One. 2021 Mar 18;16(3):e0247186. doi: 10.1371/journal.pone.0247186.

13. Nouvellet P, Bhatia S, Cori A, et al. Reduction in mobility and COVID-19 transmission. Nat Commun. 2021 Feb 17;12(1):1090. doi: 10.1038/s41467-021-21358-2.

14. Linka K, Peirlinck M, Kuhl E. The reproduction number of COVID-19 and its correlation with public health interventions. Comput Mech. 2020 Jul 28:1-16. doi: 10.1007/s00466-020-01880-8. Epub ahead of print.

15. Abraham J, Dowling K, Florentine S. Can Optimum Solar Radiation Exposure or Supplemented Vitamin D Intake Reduce the Severity of COVID-19 Symptoms? International



- 399 Journal of Environmental Research and Public Health. 2021; 18(2):740.  
400 <https://doi.org/10.3390/ijerph18020740>.
- 401 16. Nosal C, Ehlers A, Haspel JA. Why Lungs Keep Time: Circadian Rhythms and Lung  
402 Immunity. Annu Rev Physiol. 2020 Feb 10;82:391-412. doi: 10.1146/annurev-physiol-  
403 021119-034602. Epub 2019 Sep 27.
- 404 17. Kumar A, Sagdeo A, Sagdeo PR. Possibility of using ultraviolet radiation for disinfecting the  
405 novel COVID-19. Photodiagnosis Photodyn Ther. 2021 Jun;34:102234. doi:  
406 10.1016/j.pdpdt.2021.102234. Epub 2021 Feb 24.
- 407 18. Larsson SC, Gill D. Genetic predisposition to allergic diseases is inversely associated with  
408 risk of COVID-19. Allergy **2021 Dec 31**, <https://doi.org/10.1111/all.14728>.
- 409 19. Keswani A, Dhana K, Rosenthal JA, Moore D, Mahdavinia M. Ann Allergy Asthma  
410 Immunol. **2020**;125(4): 479–481, <https://doi.org/10.1016/j.anai.2020.07.012>.
- 411 20. Jackson DJ, Busse WW, Bacharier LB, et al. Association of respiratory allergy, asthma, and  
412 expression of the SARS-CoV-2 receptor, ACE2. J Allergy Clin Immunol **2020**;  
413 <https://doi.org/10.1016/j.jaci.2020.04.009>.
- 414 21. Wan Y et al. Receptor Recognition by the Novel Coronavirus from Wuhan: an Analysis Based  
415 on Decade-Long Structural Studies of SARS Coronavirus. J. Virol. **2020**. [Epub ahead of  
416 print]. <https://jvi.asm.org/content/94/7/e00127-20.long>
- 417 22. Licari A, Votto M, Brambilla I, Castagnoli R, Piccotti E, Olcese R., Tosca MA, Ciprandi G,  
418 Marseglia GL. Allergy and asthma in children and adolescents during the COVID outbreak:  
419 What we know and how we could prevent allergy and asthma flares. Allergy. **2020**  
420 Sep;75(9):2402-2405, <https://doi.org/10.1111/all.14369>.
- 421 23. Lindsley AW, Schwartz JT, Rothenberg ME. Eosinophil responses during COVID-19  
422 infections and coronavirus vaccination. J Allergy Clin Immunol. **2020** Jul;146(1):1-7,  
423 <https://doi.org/10.1016/j.jaci.2020.04.021>.

24. Ferastraoaru D, Hudes G, Jerschow E, Jariwala S, Karagic M, de Vos G, Rosenstreich D, Ramesh M. Eosinophilia in Asthma Patients Is Protective Against Severe COVID-19 Illness. *J Allergy Clin Immunol Pract*. 2021 Mar;9(3):1152-1162.e3. doi: 10.1016/j.jaip.2020.12.045. Epub 2021 Jan 23.
25. Carli G, Cecchi L, Stebbing J, Parronchi P, Farsi A. Is asthma protective against COVID-19? *Allergy* **2020**;76(3): 866-868, <https://doi.org/10.1111/all.14426>.
26. Balz K, Kaushik A, Chen M et al. Homologies between SARS-CoV-2 and allergen proteins may direct T cell-mediated heterologous immune responses. *Sci Rep* 11, 4792 (2021), <https://doi.org/10.1038/s41598-021-84320-8>.
27. Damialis A, Gilles S, Sofiev M, Sofieva V, Kolek F, Bayr D, Plaza MP, Leier-Wirtz V, Kaschuba S, Ziska LH, Bielory L, Makra L, Del Mar Trigo M; COVID-19/POLLEN study group, Traidl-Hoffmann C. Higher airborne pollen concentrations correlated with increased SARS-CoV-2 infection rates, as evidenced from 31 countries across the globe. *Proc Natl Acad Sci U S A*. 2021 Mar 23;118(12):e2019034118. doi: 10.1073/pnas.2019034118.
28. Moral de Gregorio AJ, Guzmán Rodríguez R, Senent Sánchez CJ, Lemus Calderón JA, Valero Santiago AJ; Is environmental pollen concentration a risk factor for SARS-CoV-2 infection? *Investig Allergol Clin Immunol* 2022; Vol. 32(1). doi: 10.18176/jiaci.0743.
29. [dataset] RIVM. COVID-19 reproduction number on the basis of a 95% confidence interval. [https://data.rivm.nl/covid-19/COVID-19\\_reproductiegetal.json](https://data.rivm.nl/covid-19/COVID-19_reproductiegetal.json). Accessed August 2, **2021**.
30. Backer JA, Klinkenberg D, Wallinga J. Incubation period of 2019 novel coronavirus (2019-nCoV) infections among travelers from Wuhan, China, 20-28 January 2020. *Euro Surveill*. 2020 Feb;25(5):2000062. doi: 10.2807/1560-7917.ES.2020.25.5.2000062.
31. Wallinga J, Lipsitch M. How generation intervals shape the relationship between growth rates and reproductive numbers. *Proc Biol Sci*. 2007 Feb 22;274(1609):599-604. doi: 10.1098/rspb.2006.3754.

32. [dataset] KNMI. Daily Meteorological Data download center.  
<https://www.daggegevens.knmi.nl/klimatologie/daggegevens>. Accessed August 2, 2021.
33. [dataset] Google. Mobility trends.  
[https://www.gstatic.com/covid19/mobility/Global\\_Mobility\\_Report.csv](https://www.gstatic.com/covid19/mobility/Global_Mobility_Report.csv). Accessed August 2, 2021.
34. [dataset] Nivel. Hay fever incidence in the Netherlands.  
[https://www.nivel.nl/sites/default/files/algemene-content/NivelSurveillanceBulletin\\_2021\\_wk29b.pdf](https://www.nivel.nl/sites/default/files/algemene-content/NivelSurveillanceBulletin_2021_wk29b.pdf). Accessed August 2, 2021.
35. [dataset] Elkerliek. Pollen concentrations in the Netherlands.  
<https://www.elkerliek.nl/elkerliek/hooikoorts/pollentellingen.html>. Accessed August 2, 2021.
36. [dataset] LUMC. Pollen concentrations in the Netherlands.  
<https://www.lumc.nl/org/longziekten/patientenzorg/pollen-en-hooikoorts/pollentelling/>. Accessed August 2, 2021.
37. Edridge AWD, Kaczorowska J, Hoste ACR, et al. Seasonal coronavirus protective immunity is short-lasting. Nat Med. 2020;26(11):1691-1693. doi:10.1038/s41591-020-1083-1

## FIGURES AND TABLES

**Table 1: overview means (M), standard deviations (SDs) and skewness values**

| Variable                            | N   | Mean | SD    |
|-------------------------------------|-----|------|-------|
| Hay Fever                           | 218 | 131  | 73.8  |
| Log <sub>10</sub> (Hay Fever)       | 218 | 2.06 | 0.215 |
| Log <sub>10</sub> (Pollen)          | 218 | 1.84 | 0.464 |
| Log <sub>10</sub> (Solar Radiation) | 218 | 3.15 | 0.273 |

|                                                      |     |      |       |
|------------------------------------------------------|-----|------|-------|
| Log <sub>10</sub> (Solar Radiation <sub>7dma</sub> ) | 218 | 3.18 | 0.198 |
| Temperature <sup>2</sup>                             | 218 | 221  | 142   |
| Dew point temperature                                | 218 | 8.56 | 5.70  |
| Sqrt(Mobility: Indoor recreation)                    | 218 | 214  | 35.8  |
| Sqrt(R <sub>i</sub> )                                | 218 | 1.03 | 0.163 |

Table 1: Overview of mean (*M*), and standard deviation (*SD*) per independent variable as used in the multiple linear regression models. The function Sqrt returns the square root of the variable.

**Table 2: multiple linear regression for mobility and environmental predictors**

|                                            | <i>Coeff.</i> | <i>SE</i> | <i>t-stat</i> | <i>lower</i><br><i>t</i> <sub>0.025(213)</sub> | <i>upper</i><br><i>t</i> <sub>0.975(213)</sub> | <i>Stand.</i><br><i>Coeff.</i> | <i>p</i> | <i>VIF</i> |
|--------------------------------------------|---------------|-----------|---------------|------------------------------------------------|------------------------------------------------|--------------------------------|----------|------------|
| <i>b</i>                                   | 0.804         | 0.0961    | 8.37          | 0.615                                          | 0.994                                          | 0                              | <0.00001 |            |
| <i>Sqrt</i> (Mobility: Indoor recreation)  | 0.00385       | 0.000174  | 22.1          | 0.0035                                         | 0.00419                                        | 0.842                          | <0.00001 | 2.48       |
| <i>Log</i> <sub>10</sub> (Hay Fever)       | -0.132        | 0.0241    | -5.46         | -0.179                                         | -0.084                                         | -0.173                         | <0.00001 | 1.72       |
| <i>Log</i> <sub>10</sub> (Solar Radiation) | -0.0637       | 0.0201    | -3.17         | -0.103                                         | -0.024                                         | -0.106                         | 0.00177  | 1.93       |
| Temperature <sup>2</sup>                   | -0.000561     | 0.0000401 | -14.0         | -0.00063                                       | -0.000482                                      | -0.489                         | <0.00001 | 2.09       |

Table 2: Overview of outcomes per predictor after multiple linear regression for both mobility and environmental variables. Selection of predictors is based on being (highly) significant and having multicollinearity (*VIF*) score below 2.5. The function Sqrt returns the square root of the variable.

**Table 3: multiple linear regression for environmental predictors only**

|                                             | Coeff.    | SE        | t-stat | lower<br>t <sub>0.025(213)</sub> | upper<br>t <sub>0.975(213)</sub> | Stand.<br>Coeff. | p         | VIF  |
|---------------------------------------------|-----------|-----------|--------|----------------------------------|----------------------------------|------------------|-----------|------|
| b                                           | 3.00      | 0.100     | 30.0   | 2.80                             | 3.19                             | 0                | <0.00001  |      |
| Log <sub>10</sub> (Pollen)                  | -0.0587   | 0.0144    | -4.08  | -0.0870                          | -0.0303                          | -0.167           | 0.0000633 | 1.56 |
| Log <sub>10</sub> (Solar radiation<br>7dma) | -0.592    | 0.0370    | -16.0  | -0.664                           | -0.519                           | -0.717           | <0.00001  | 1.89 |
| Dew point temperature                       | 0.00674   | 0.00109   | 6.19   | 0.00459                          | 0.00888                          | 0.235            | <0.00001  | 1.35 |
| Hay fever                                   | -0.000262 | 0.0000903 | -2.91  | -0.000440                        | -0.0000844                       | -0.118           | 0.00405   | 1.56 |

Table 3: Overview of outcomes per selected environmental predictor after multiple linear regression.

Selection of predictors is based on being (highly) significant and having multicollinearity (VIF) score below 2.5.

Figure 1: scatter diagram predicted versus observed reproduction number

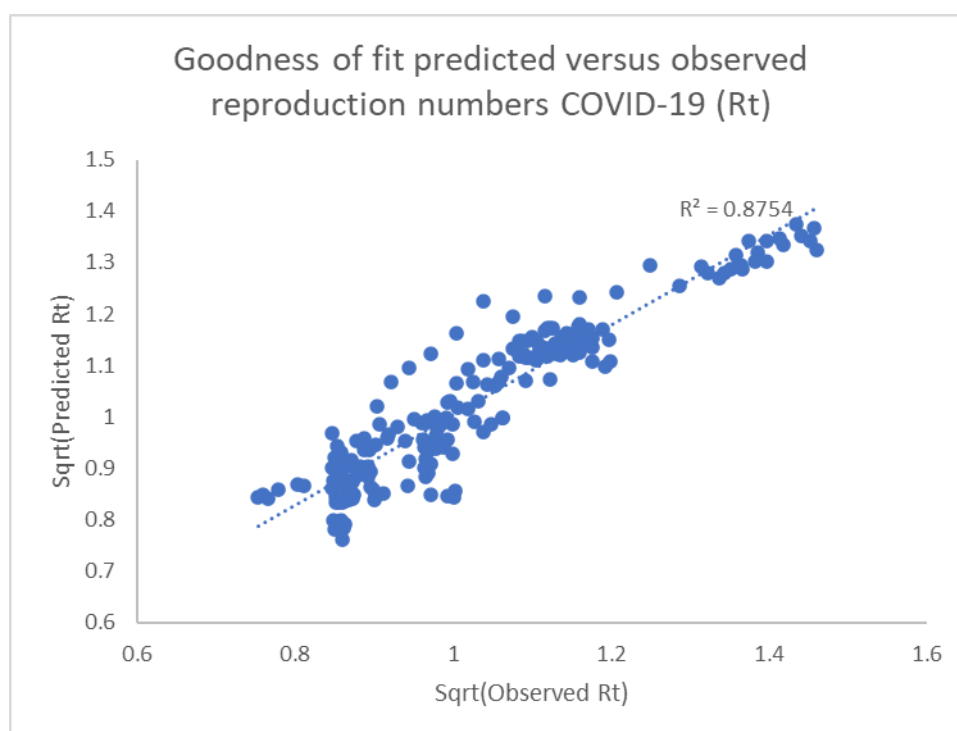

*Fig. 1: The combined mobility and environmental model is superior as its predictions ( $\hat{R}_t$ ) explain 87.5% of the variance of the observed reproduction number of COVID-19 ( $R_t$ ) during allergy season.*

**Figure 2. Time series predicted versus observed reproduction number COVID-19**

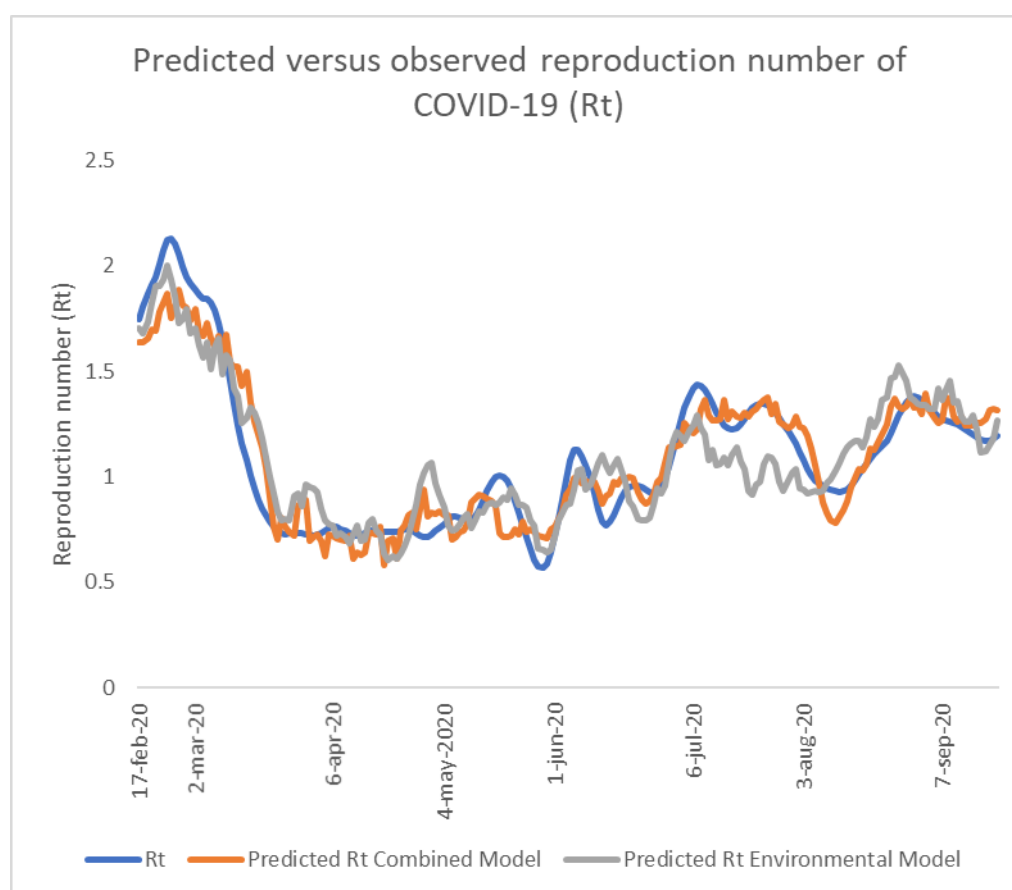

*Fig. 2. The time series of the predicted ( $\hat{R}_t$ ) versus the observed reproduction number of COVID-19 ( $R_t$ ) in the Netherlands show the very good fit of both the combined and environmental model during allergy season in the Netherlands. However, the Combined Model predicts  $R_t$  even better. The seasonality effect in March is visible in both model.*

## ACKNOWLEDGEMENTS

Thanks to Geert H. Keetels, Bas J.H. van de Wiel of Delft University of Technology for help with dew point temperature calculation, and discussing insights related to specific humidity and COVID-19.

497 Further, thanks to Letty de Weger of Leiden University Medical Center for providing pollen statistics  
498 and providing useful insights.

499

## 500 **FOOTNOTES PAGE**

501 **Martijn Hoogeveen:** Conceptualization, Methodology, Data Curation, Formal Analysis, Writing,  
502 Investigation, Visualization, Resources.

503 **Ellen Hoogeveen:** Methodology, Writing, Resources.

504 **Aloys Kroes:** Conceptualization, Reviewing, Data Curation.

## 505 **Funding**

506 This research did not receive any specific grant from funding agencies in the public, commercial, or  
507 not-for-profit sectors.

## 508 **Declarations of interest**

509 None.

## 510 **Data statement**

511 The links to downloadable datasets are provided in the reference list or references to the sources are  
512 included. Upon request, the data used for this manuscript is available for inspection, but for other  
513 purposes we kindly refer to the respective copyright-holder(s).

## 514 **Corresponding author**

515 Martijn Hoogeveen, PhD

516 Attn. Marga Winnubst

517 Department of Technology & Environment

518 Open Universiteit Nederland

519 Valkenburgerweg 177

520 6419 AT Heerlen

521 the Netherlands

522 Tel: +31 (6) 54256476

523 Email: [martijn.hoogeveen@icecat.com](mailto:martijn.hoogeveen@icecat.com).

524
